# Supplementary material for: Analysis of the key genes of Lactobacillus reuteri strains involved in the protection against alcohol-induced intestinal barrier damage
Source: Royal Society of Chemistry journal article supplement (doi:10.1039/d4fo01796j), 2024-01-01
Supplement: d4fo01796j1.xlsx [file d4fo01796j1.xlsx]

## Sheet: Table S1
Table S1. Distribution of the core Cluster of Orthologous Groups (COGs) that have a copy number disparity of at least two copies.
COG No.	L. reuteri FSCDJY33M3	L. reuteri FGSZY33L6	L. reuteri FCQHCL8L6
COG0004	0	0	2
COG0006	0	2	2
COG0025	2	3	2
COG0026	0	2	2
COG0030	0	2	0
COG0031	2	2	2
COG0038	0	4	4
COG0039	6	6	5
COG0053	2	2	0
COG0095	0	2	2
COG0108	0	2	0
COG0110	0	4	4
COG0124	2	0	0
COG0127	0	2	2
COG0137	0	2	0
COG0142	0	3	3
COG0144	0	2	2
COG0149	2	3	3
COG0154	0	0	2
COG0167	0	2	2
COG0178	2	2	2
COG0187	0	2	2
COG0188	0	2	2
COG0194	0	2	2
COG0199	0	0	2
COG0201	0	2	2
COG0210	0	0	2
COG0239	0	2	4
COG0242	0	2	2
COG0248	2	0	0
COG0267	0	2	2
COG0274	0	0	2
COG0281	0	2	0
COG0282	0	0	2
COG0285	0	2	2
COG0286	0	0	2
COG0300	0	0	4
COG0310	0	0	2
COG0328	0	2	2
COG0345	0	2	2
COG0346	0	3	3
COG0351	2	2	2
COG0366	0	2	2
COG0381	2	2	2
COG0392	0	2	2
COG0394	2	3	2
COG0406	0	5	7
COG0420	0	2	2
COG0431	0	3	4
COG0436	4	6	6
COG0438	2	13	14
COG0446	0	3	3
COG0454	2	0	0
COG0457	0	3	4
COG0475	0	2	2
COG0477	6	0	0
COG0480	0	2	2
COG0488	4	5	5
COG0492	0	3	3
COG0503	0	3	3
COG0516	0	2	2
COG0517	0	2	2
COG0524	0	2	2
COG0531	9	15	15
COG0534	0	2	2
COG0542	0	3	3
COG0561	0	5	5
COG0562	0	0	2
COG0564	0	4	4
COG0566	0	3	3
COG0577	0	4	4
COG0582	4	8	4
COG0583	2	7	8
COG0586	0	3	3
COG0588	0	2	2
COG0589	2	5	5
COG0595	0	2	2
COG0610	0	0	2
COG0612	0	2	2
COG0619	0	2	4
COG0620	2	0	2
COG0624	2	4	4
COG0628	0	3	3
COG0629	2	0	2
COG0634	0	2	2
COG0637	0	2	2
COG0640	2	4	2
COG0642	0	2	2
COG0653	0	3	2
COG0655	0	0	3
COG0656	4	8	8
COG0657	0	4	4
COG0664	2	2	3
COG0670	0	2	2
COG0671	0	3	3
COG0675	3	2	0
COG0697	2	0	0
COG0706	0	2	2
COG0708	2	2	2
COG0716	2	3	4
COG0719	0	3	3
COG0732	0	0	3
COG0735	0	2	2
COG0740	2	0	0
COG0744	0	2	2
COG0764	0	2	2
COG0765	0	6	6
COG0766	2	2	2
COG0768	0	2	2
COG0771	0	2	2
COG0772	0	2	2
COG0778	0	2	2
COG0782	0	2	2
COG0783	0	2	0
COG0789	0	4	6
COG0791	2	4	8
COG0796	0	0	2
COG0833	0	2	2
COG0846	0	3	0
COG0847	0	2	2
COG0849	0	0	2
COG1012	0	2	4
COG1015	0	2	3
COG1051	0	3	3
COG1052	3	0	0
COG1053	0	0	2
COG1061	2	0	0
COG1064	0	2	2
COG1070	3	4	4
COG1073	0	5	6
COG1077	0	2	2
COG1080	2	2	2
COG1104	0	2	2
COG1109	0	2	2
COG1113	4	4	4
COG1114	2	2	2
COG1122	0	2	4
COG1126	3	5	5
COG1131	0	4	5
COG1132	0	3	3
COG1136	0	3	3
COG1161	0	2	2
COG1167	2	0	0
COG1174	0	2	2
COG1192	0	2	0
COG1196	0	3	3
COG1215	2	4	5
COG1216	0	3	2
COG1247	0	2	2
COG1249	0	3	3
COG1253	2	2	2
COG1266	0	2	2
COG1278	0	3	2
COG1288	0	4	2
COG1296	0	2	2
COG1302	0	3	3
COG1307	0	2	2
COG1309	0	7	8
COG1316	2	2	2
COG1335	2	0	0
COG1368	2	2	2
COG1376	3	3	3
COG1388	4	5	7
COG1396	0	3	7
COG1418	0	3	3
COG1428	0	2	2
COG1438	0	2	2
COG1442	0	2	3
COG1454	0	0	2
COG1455	0	0	2
COG1457	2	0	3
COG1464	2	3	3
COG1475	0	2	3
COG1476	0	4	5
COG1479	0	2	0
COG1482	0	2	2
COG1484	2	2	3
COG1488	3	2	2
COG1502	2	3	3
COG1511	0	3	2
COG1525	0	0	3
COG1577	0	2	2
COG1609	2	10	10
COG1680	0	2	2
COG1686	2	2	2
COG1694	0	2	3
COG1695	0	2	2
COG1733	0	4	3
COG1757	2	2	2
COG1760	0	2	2
COG1780	2	2	2
COG1783	0	0	2
COG1794	2	0	0
COG1804	2	0	0
COG1814	0	2	2
COG1846	0	5	8
COG1893	0	2	2
COG1902	0	3	0
COG1914	2	2	2
COG1917	0	2	0
COG1942	0	2	0
COG1957	0	3	3
COG1961	0	0	2
COG2017	0	2	2
COG2055	0	2	0
COG2066	2	2	2
COG2071	2	0	0
COG2096	0	0	2
COG2141	0	2	0
COG2148	0	2	2
COG2151	0	3	2
COG2153	0	2	2
COG2188	0	2	2
COG2190	2	3	2
COG2200	0	0	2
COG2207	0	0	2
COG2211	3	3	5
COG2217	0	3	2
COG2223	0	2	2
COG2233	0	2	2
COG2244	0	3	3
COG2252	0	0	2
COG2256	0	0	2
COG2265	0	2	2
COG2267	0	3	0
COG2271	0	2	2
COG2274	0	0	2
COG2337	0	2	2
COG2357	0	2	2
COG2364	0	2	2
COG2365	0	0	2
COG2367	0	0	2
COG2373	2	0	0
COG2390	0	2	2
COG2755	0	2	2
COG2761	0	2	2
COG2801	0	6	0
COG2807	0	0	2
COG2826	7	2	2
COG2856	2	0	0
COG2918	2	2	3
COG2963	2	7	0
COG2966	0	2	2
COG2984	2	2	2
COG3064	0	0	3
COG3118	0	4	2
COG3201	2	0	2
COG3250	0	3	2
COG3266	0	0	5
COG3274	0	2	0
COG3290	0	0	3
COG3382	0	2	2
COG3464	6	0	0
COG3579	0	2	2
COG3599	0	2	2
COG3666	0	4	0
COG3757	0	0	3
COG3760	0	0	2
COG3830	0	2	0
COG3944	0	2	2
COG3971	2	0	0
COG3973	2	2	2
COG4292	0	0	2
COG4300	0	2	2
COG4469	0	2	0
COG4485	0	3	3
COG4584	4	2	0
COG4633	0	2	2
COG4679	0	2	0
COG4690	5	5	5
COG4720	0	2	3
COG4814	3	5	6
COG4841	0	2	2
COG4892	5	5	5
COG4909	0	0	2
COG4932	2	4	3
COG4974	0	5	3
COG4975	2	0	2
COG5002	0	4	4
COG5263	4	3	2
COG5438	0	2	2
COG5464	2	3	3
COG5546	2	0	0
COG5549	2	3	3

## Sheet: Table S2
Table S2. The primers sequences used for real-time quantitative PCR.
Gene	Sequence
MUC2	Forward: GAAGTGAAGACCGAGATTGTG
	Reverse: GTATGTGATGGAGCCTGAAAC
Occludin	Forward: CACGCTTGCCTGGGACAGAG
	Reverse: TCTGTATAGCCTCCGTAGCC
Claudin-3	Forward: CGAGAAGAAGTACACGGCCAC
	Reverse: GTCTGTCCCTTAGACGTAGTCC
IL-1β	Forward: TGGACCTTCCAGGATGAGGACA
	Reverse: GTTCATCTCGGAGCCTGTAGTG
IL-6	Forward: TACCACTTCACAAGTCGGAGGC
	Reverse: CTGCAAGTGCATCATCGTTGTTC
TNF-α	Forward: GGTGCCTATGTCTCAGCCTCTT
	Reverse: GCCATAGAACTGATGAGAGGGAG
