# Supplementary material for: Analysis of the key genes of Lactobacillus reuteri strains involved in the protection against alcohol-induced intestinal barrier damage
Source: Royal Society of Chemistry journal article supplement (doi:10.1039/d4fo01796j), 2024-01-01
Supplement: d4fo01796j2.pdf [file d4fo01796j2.pdf]

Supporting information for:

## Analysis of the key genes of *Lactobacillus reuteri* strains involved in the protection of alcohol-induced intestinal barrier damage

Jiayi Zhang<sup>a, b</sup>, Chengcheng Zhang<sup>a, b, c</sup>, Leilei Yu<sup>a, b, c</sup> and Wei Chen<sup>a, b, c</sup>, Qixiao Zhai

a, b, c, \*

<sup>a</sup> State Key Laboratory of Food Science and Resources, Jiangnan University, Wuxi 214122, China

<sup>b</sup> School of Food Science and Technology, Jiangnan University, Wuxi, Jiangsu 214122, China

<sup>c</sup> National Engineering Research Center for Functional Food, Jiangnan University, Wuxi, Jiangsu 214122, China

\*Corresponding authors.

[zhaiqixiao@jiangnan.edu.cn](mailto:zhaiqixiao@jiangnan.edu.cn)

### Method of bacteria suspension preparation:

The bacteria activated to the third generation in MRS liquid culture medium was diluted with physiological saline to obtain four gradient dilutions of  $10^{-4}$ ,  $10^{-5}$ ,  $10^{-6}$ ,  $10^{-7}$ . Take 100ul of each dilution and apply it to the MRS solid plate, with three parallel gradients for each gradient. After incubation at 37°C for 24 hours at a constant humidity, plate counts were performed to determine the final volume of bacterial sludge resuspension. Subsequently, the third-generation strain was inoculated into the same batch of liquid culture medium, and was cultured under the same culture conditions; after 12 h, the bacterial solution was centrifuged at  $8000 \times g$  for 10 min at 4°C, and the supernatant was discarded. According to the plate count results, add a certain volume of sterile physiological saline to the obtained bacterial slurry before each gastric administration. Resuspend the strain until the final concentration of the strain suspension is  $10^9$  CFU/ml.

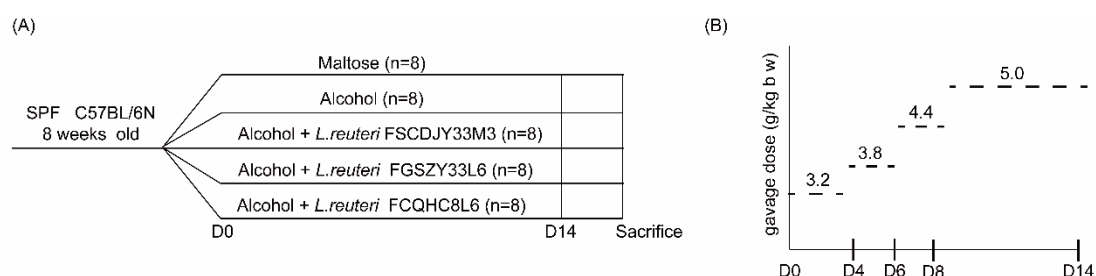

**Figure S1. Experimental design of changes of gut microbiota homeostasis in mice after continuous alcohol intake**

(A) Animal experimental design. (B) Changes of alcohol intragastric gradient.

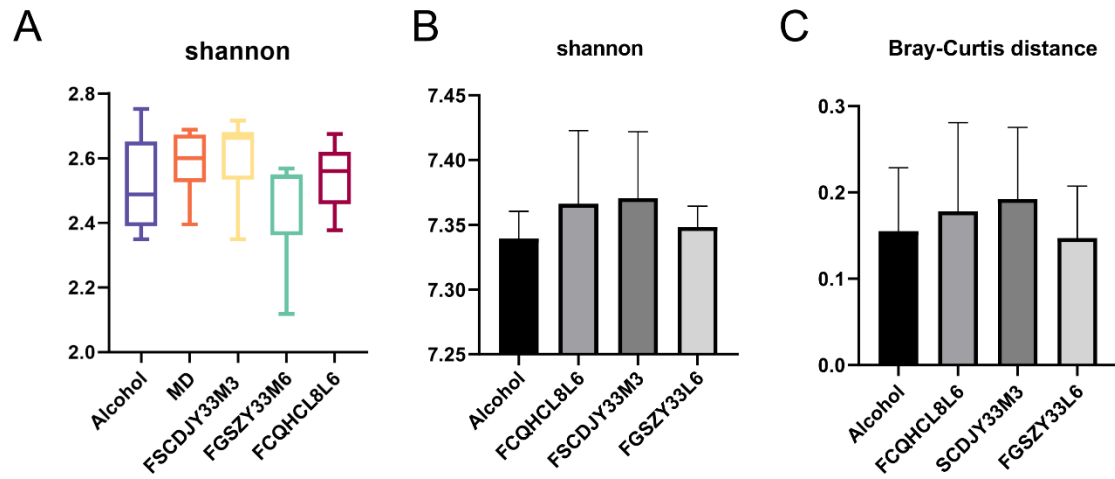

**Figure S2. Effects of *Lactobacillus reuteri* FSCDJY33M3, FCQHC8L6, and FYND33L6 on the  $\alpha$  diversity and metabolic homeostasis of microbiota.**

(A)  $\alpha$  diversity of intestinal flora changes in mice after alcohol intake. (B)  $\alpha$  diversity changes in the KEGG pathway. (C)  $\beta$  diversity changes in the KEGG pathway.
